# Supplementary material for: Investigating the Impact of the Washing Steps of Layered Double Hydroxides (LDH) on the Electrochemical Performance
Source: MDPI journal article supplement (doi:10.3390/nano12030578), 2022-02-08
Supplement: s1 [file s1]

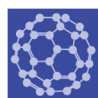

# Investigating the Impact of the Washing Steps of Layered Double Hydroxides (LDH) on the Electrochemical Performance

Gayi Nyongombe \*, Guy L. Kabongo, Luyanda L. Noto and Mokhotjwa S. Dhlamini \*

Department of Physics, School of Science, CSET, University of South Africa, Private Bag X6, Florida, Science Campus, Christiaan de Wet and Pioneer Avenue, Florida Park, Johannesburg 1710, South Africa; leba.kabongo@gmail.com (G.L.K.); notoll@unisa.ac.za (L.L.N.)

\* Correspondence: gayinyongombe@gmail.com (G.N.); dhlamms@unisa.ac.za (M.S.D.)

## S.1. Williamson Hall Plots

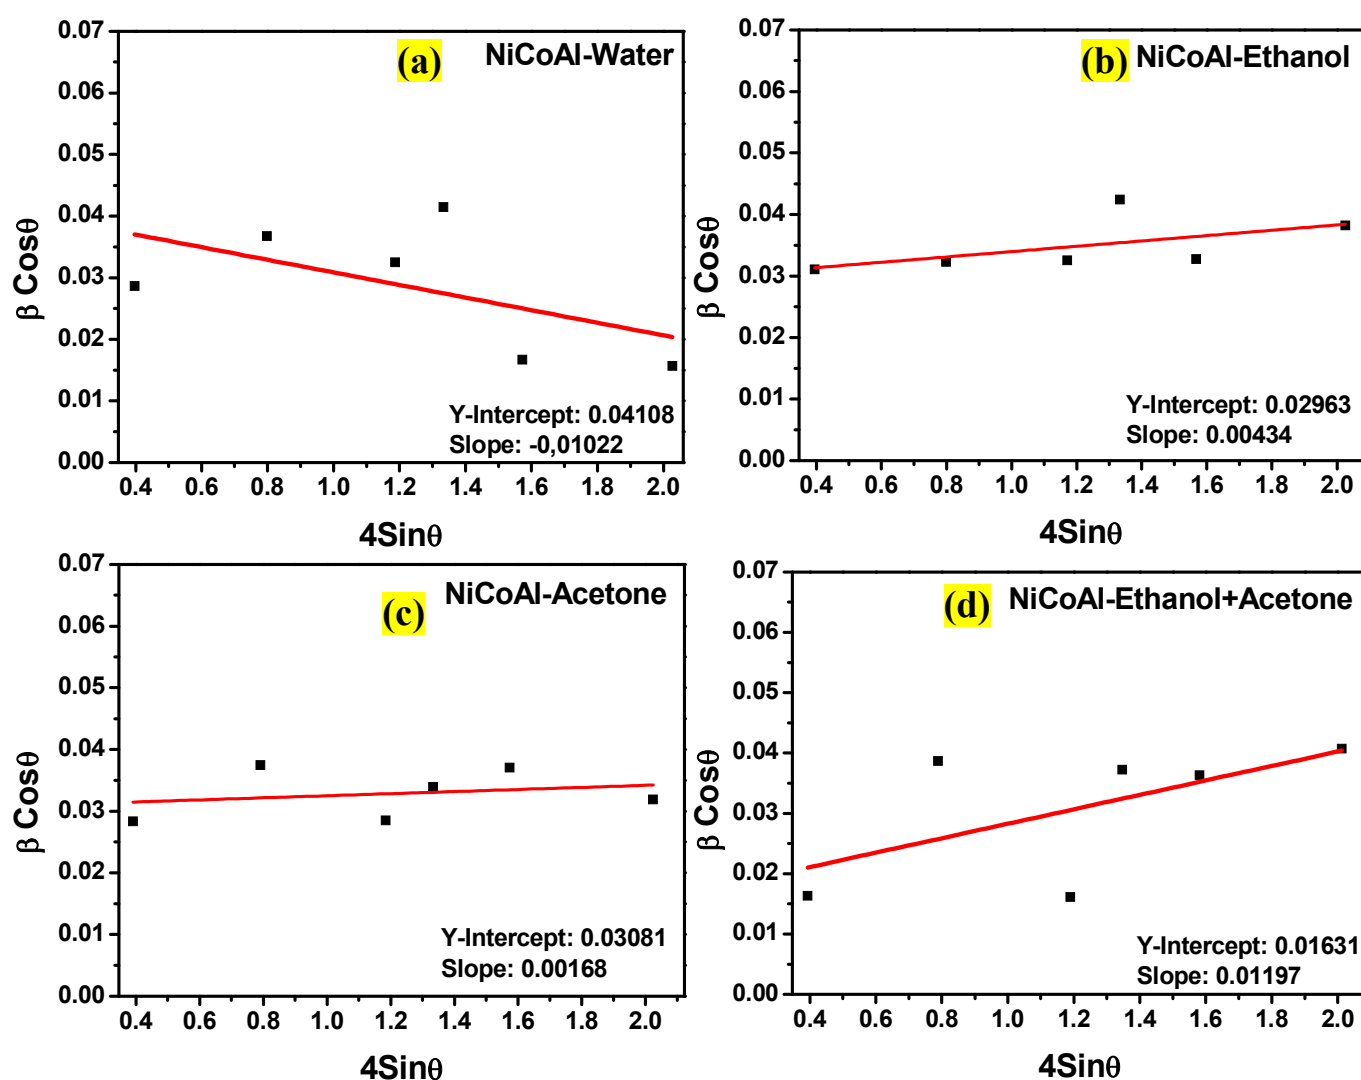

Figure S1. (a–d) W-H plots for NiCoAl-Water, NiCoAl-Ethanol, NiCoAl-Acetone, NiCoAl-Ethanol+Acetone ( $\beta \cos\theta$  as a function of  $4\sin\theta$ )

## S.2. Energy-Dispersive X-Ray Spectroscopy (EDS)

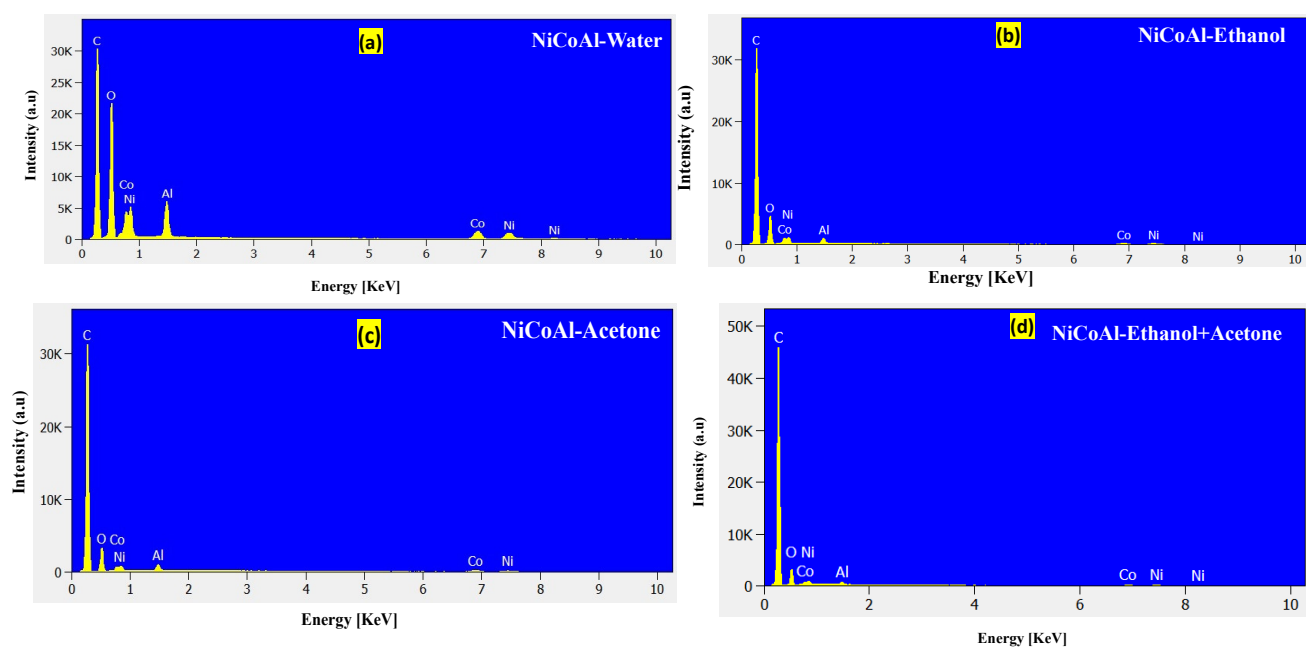

**Figure S2.** EDS spectra of (a) NiCoAl-water, (b) NiCoAl-Ethanol, (c) NiCoAl-Acetone, and (d) NiCoAl-Ethanol+Acetone.

### S.3. Energy-Dispersive X-Ray Spectroscopy-Mapping

#### NiCoAl-Water

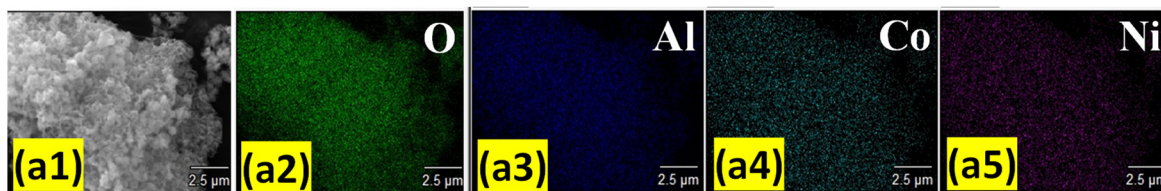

#### NiCoAl-Ethanol

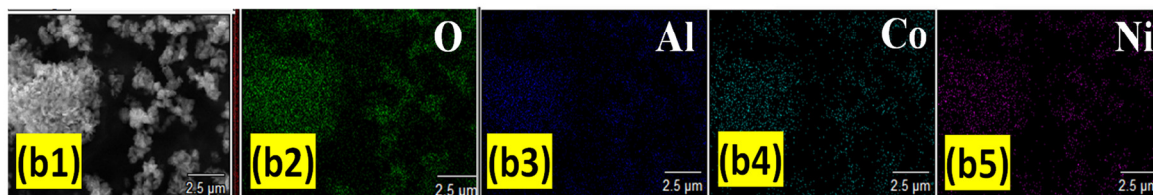

#### NiCoAl-Acetone

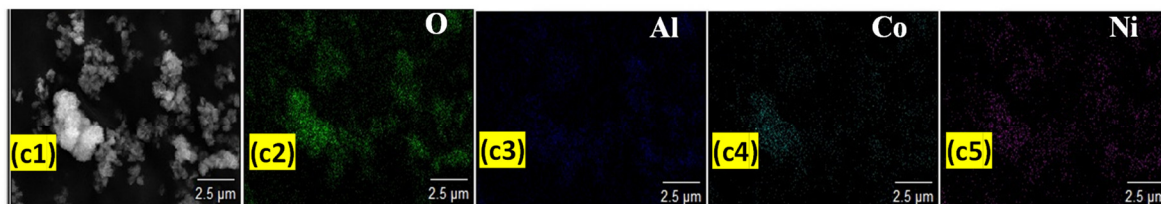

#### NiCoAl-Ethanol+Acetone

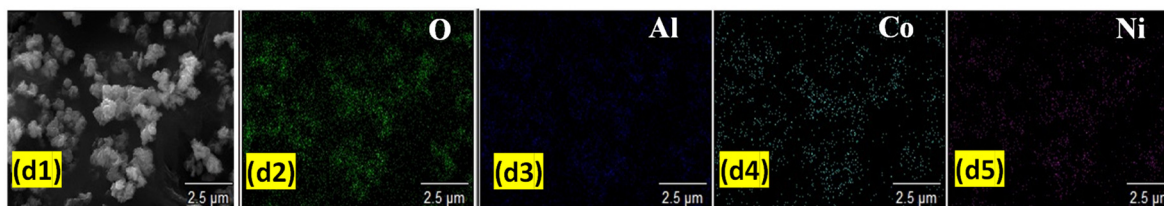

Figure S3. (a1, b1, c1, d1) SEM images of areas used to conduct EDS mappings; (a2–a5), (b2–b5), (c2–c5) and (d2–d5) corresponding elemental mappings of O, Al, Co and Ni.

#### S.4. Cyclic voltammetry (CV)

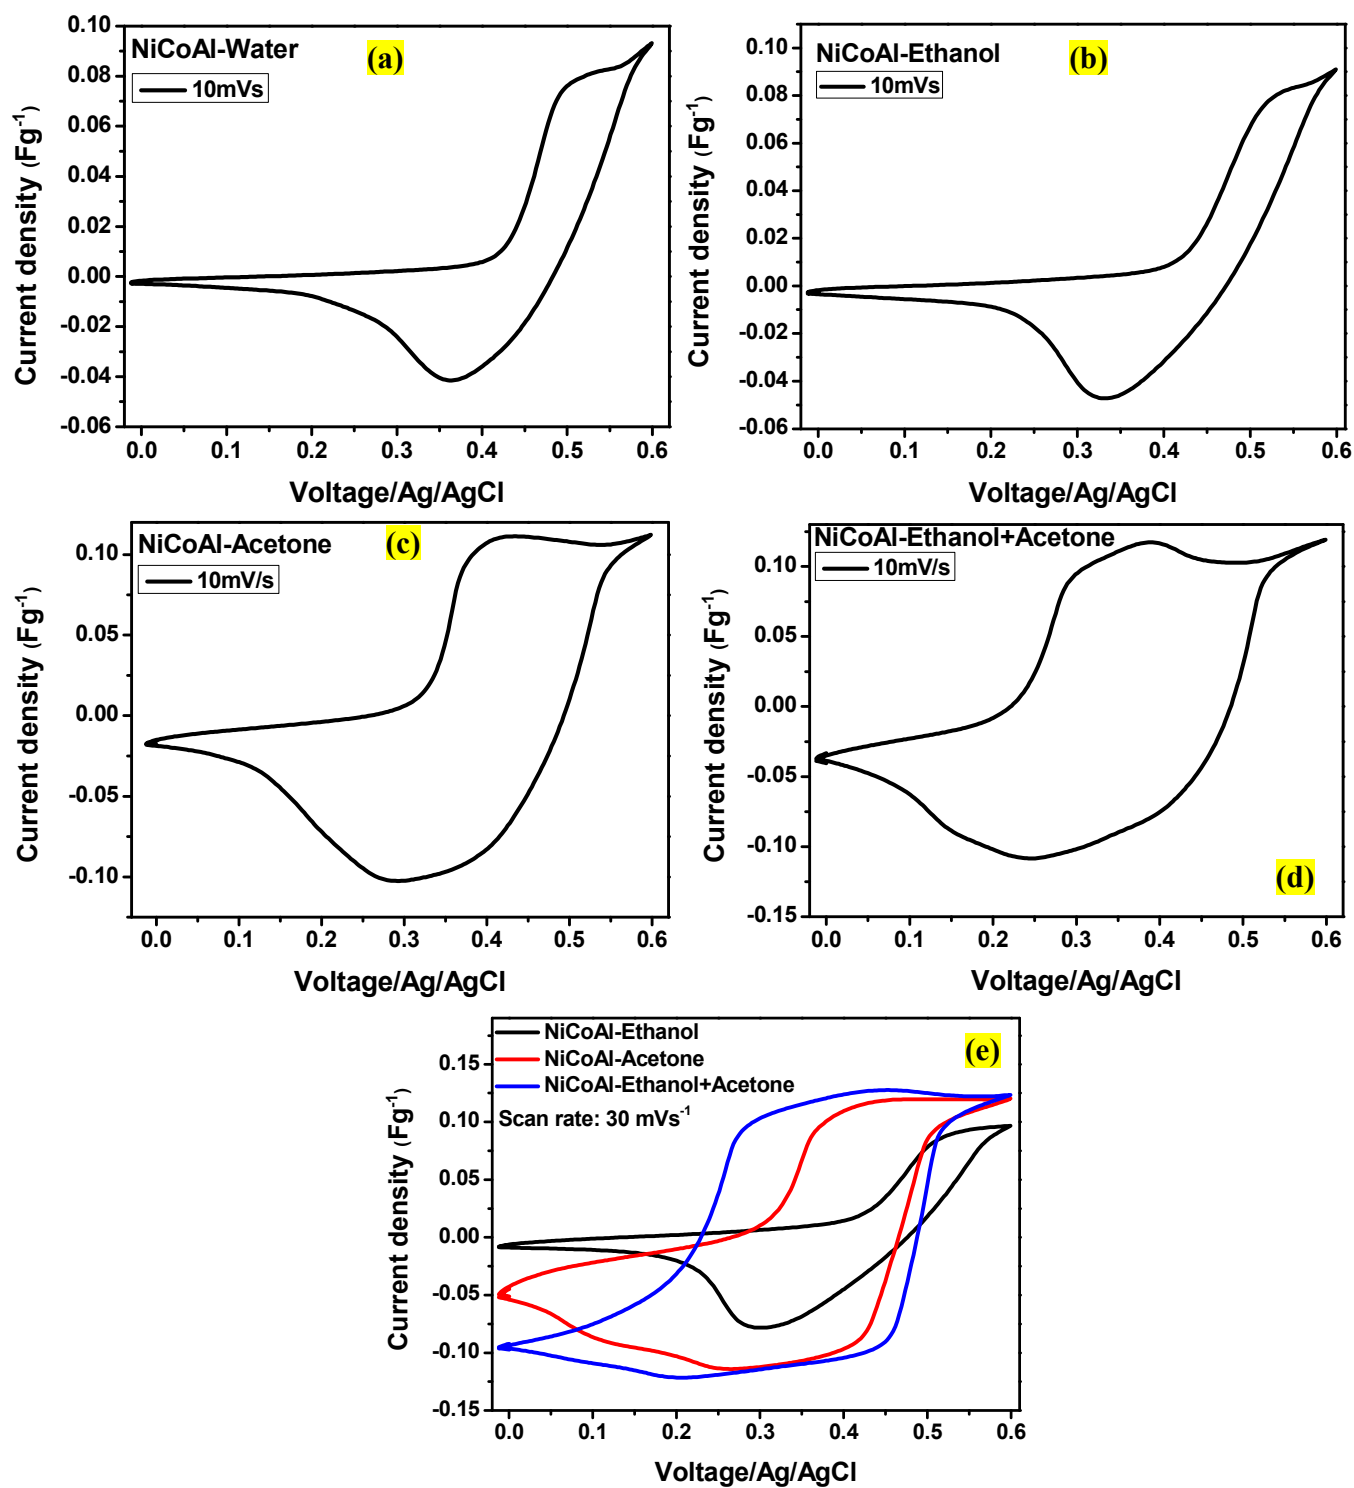

Figure S4. CV curves of (a) NiCoAl-Water, (b) NiCoAl-Ethanol, (c) NiCoAl-Acetone, (d) NiCoAl-Ethanol+Acetone at a scan rate of 10 mVs $^{-1}$ , and comparative CV curves of NiCoAl-Ethanol, NiCoAl-Acetone, and NiCoAl-Ethanol+Acetone at the scan rate of 30 mVs $^{-1}$ .

### S.5. Electrochemical Impedance Spectroscopy (EIS)

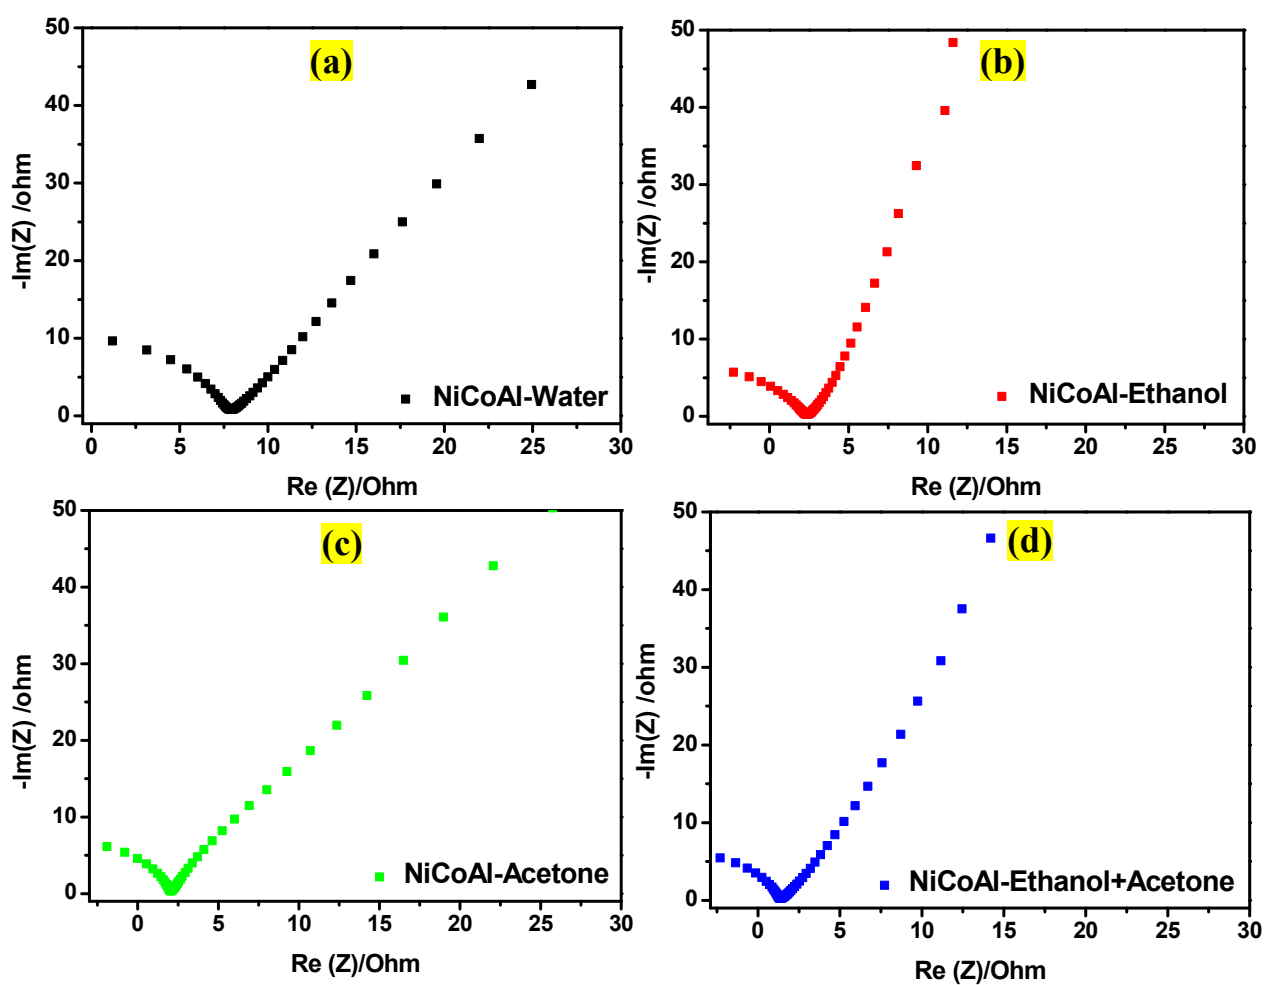

Figure S5. Nyquist plots for (a) NiCoAl-Water, (b) NiCoAl-Ethanol, (c) NiCoAl-Acetone, and (d) NiCoAl-Ethanol+Acetone.
